# Supplementary material
Source: PubMed Central journal article supplement (PMC4114948)
Supplement: supp_tpc.114.123281_tpc123281_SupplementalData.pdf [file supp_tpc.114.123281_tpc123281_SupplementalData.pdf]

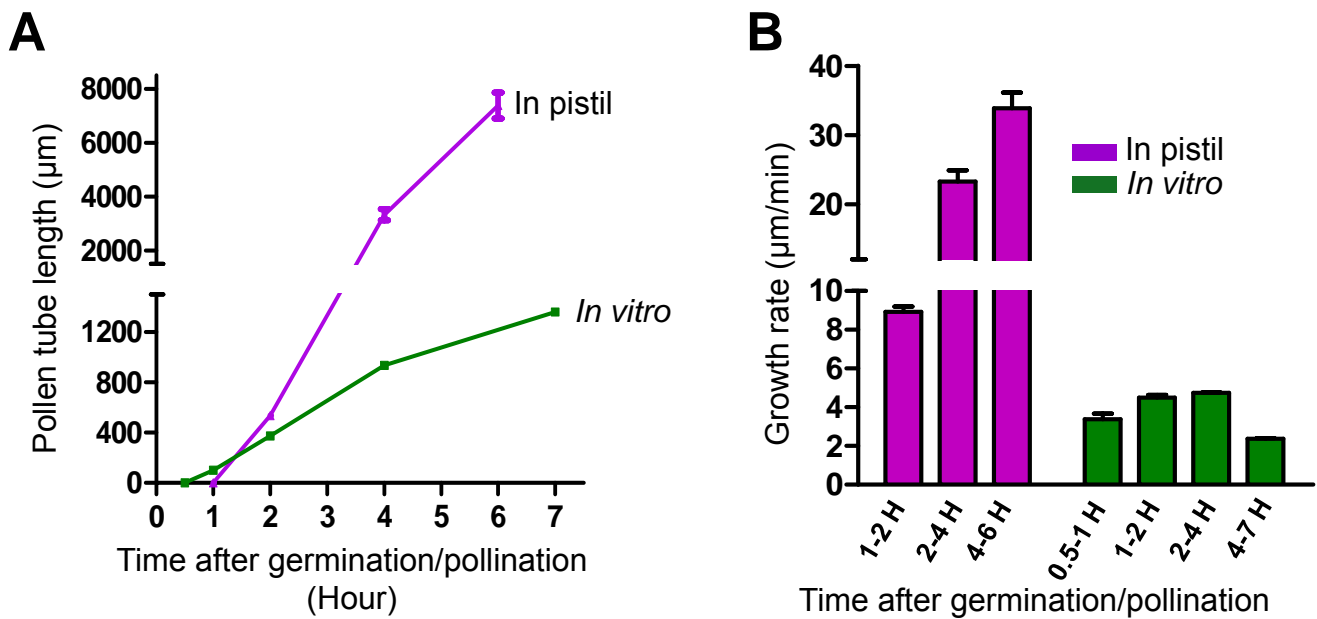

**Supplemental Figure 1.** Tomato pollen tube growth rate is faster in pistils than in optimized germination medium. A in vivo or in vitro pollen tube lengths at different time points. Pollen tubes begin to emerge at about 1 hour after pollination while it takes 30 minutes for pollen to germinate in germination medium. B. in vivo or in vitro pollen tube growth rate in (A). n = 3 independent experiments. At least 6 pistils were observed for each in vivo pollination experiment. More than 60 pollen tubes were measured for each time point of in vitro culture. Error bars indicate standard error.

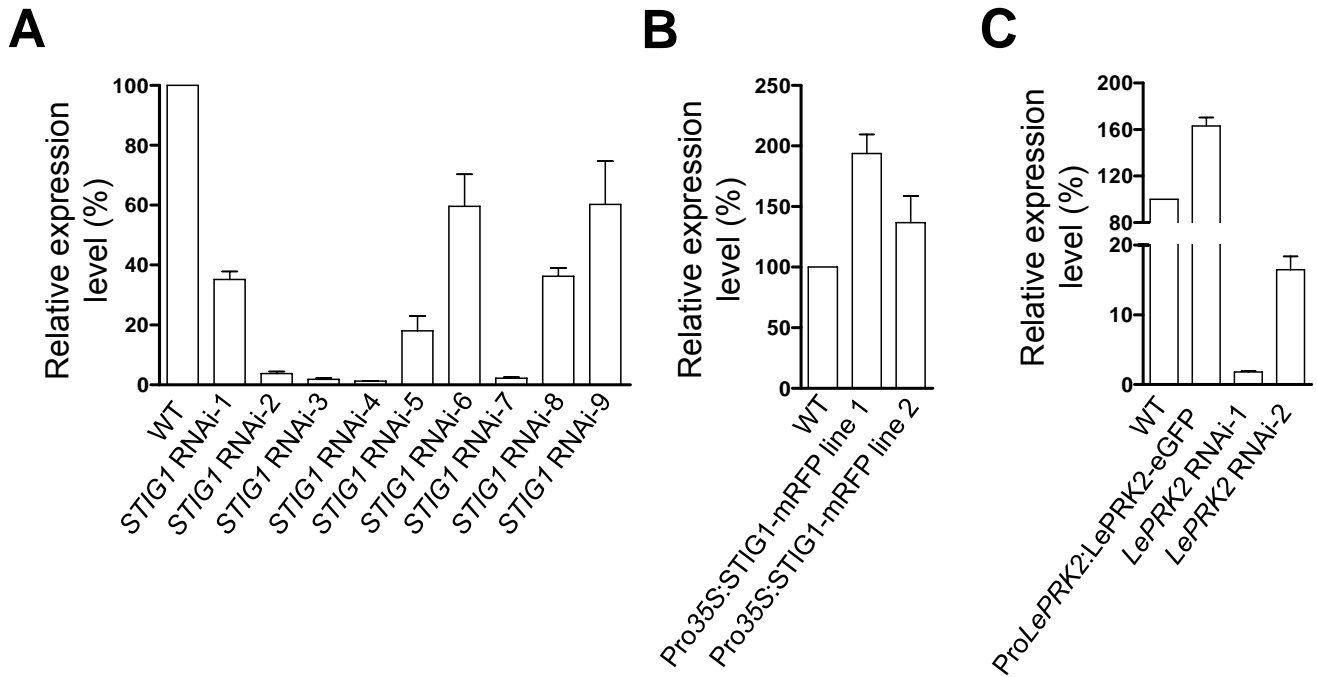

**Supplemental Figure 2.** Expression levels of target genes in transgenic tomato plants generated in this study. A and B. Quantitative reverse transcription-PCR of *STIG1* mRNA levels in nine *STIG1* RNAi lines (A) or two *STIG1* over-expressing lines (B), using total RNA of un-pollinated mature stigmas. C. Quantitative reverse transcription-PCR of *LePRK2* mRNA levels in one *LePRK2* over-expressing line and two *LePRK2* RNAi lines, using total RNA of mature pollen. n = 3 independent experiments. Error bars indicate standard error.

```

Sl-STIG1 1   MDFI-ILLIAILALSSTPITIISGSVTNHTYSTTNSYTNVALSARKVVFPPPRQLGK--DNSDDDDLICK 67
Nt-STIG1 1   MAFINLLILIIILTLSSPTITMSIPETNRRNATTNSYTDVALSARKGAFPPPRKLGEYSTNSTDYNLICK 70
Ph-STIG1 1   MAFI-NVLIIIILTLSSPTISILSGPVTYNTNSTTNSSTNVAVSARKGADPPSKQPGG-----DNMICE 62
Consensus * **  ::: **:*****: :* . * . :**** *:***:**** . **.: : *          :***:

      ↓
Sl-STIG1 68   TCKRLSEHRTCCFNYFCVDLFTNRFNCGSCGLVCIVGTRCCGGICVDIKKDNGNCGKCNNVCSPGQNCSF 137
Nt-STIG1 71   TCKRLSERNTCCFNYSCVDVSTNRFNCGSCGLVCNLGTRCCGGICVDIQKDNGNCGKCSNVCSPGQKCSF 140
Ph-STIG1 63   TCRALSEKLTCCFNASCVDLSSNRFNCGSCGIVCDLRTRCCGGLCVDITKDNGNCGNCGNACAPGQDCSF 132
Consensus **: ***: ***** ***: :*****:*** : *****:**** *****:*. *. *:***.***

Sl-STIG1 138 GLCVSA 143
Nt-STIG1 141 GFCDYA 146
Ph-STIG1 133 GLCGYA 138
Consensus *:* *
  
```

**Supplemental Figure 3.** STIG1 peptides identified by mass spectrophotometry of stigmatic exudate of tomato, tobacco and petunia. Tobacco and petunia peptides are boxed in dark grey or light grey. Tomato peptides identified from the 5-10 kDa section are boxed in red or blue. The additional peptides identified in the 10-15 kDa section are boxed in violet. Petunia peptide data are taken from Verhoeven et al., (2005). Identical (\*) or similar (:) amino acids are noted below. Arrow indicates putative cleavage site.

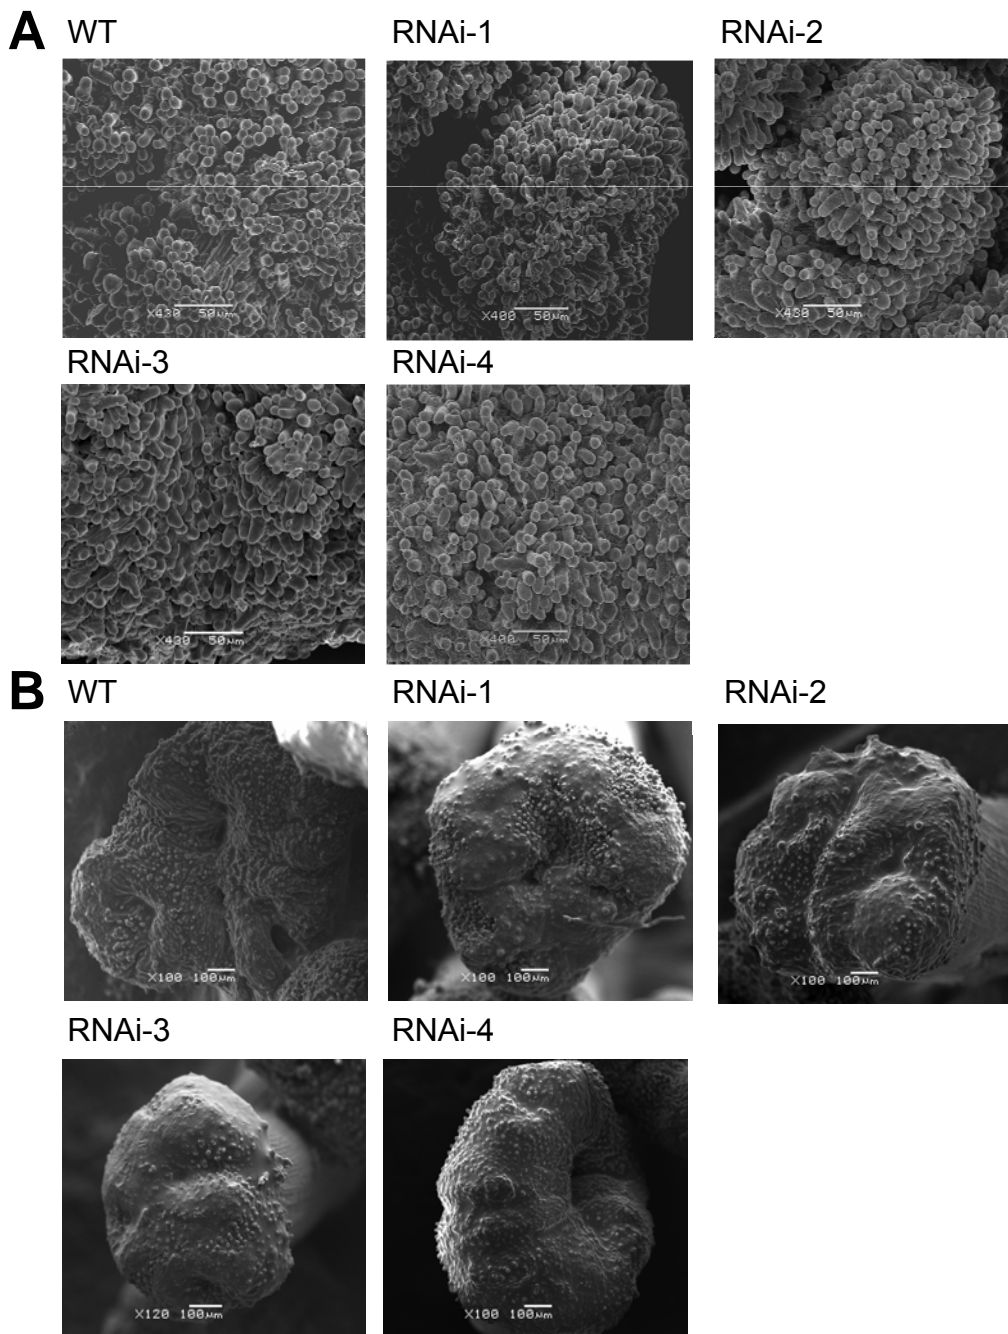

**Supplemental Figure 4.** Mature stigmas of *STIG1* RNAi plants have normal morphology but accumulate more exudate than wild-type stigmas. A. Representative images of mature stigmas from wild-type and *STIG1* RNAi plants. Conventional scanning electron microscopy. At least 6 mature stigmas were observed for each line. Scale bar = 50 µm. B. Representative images of the exudate on mature stigmas from wild-type and *STIG1* RNAi plants. Cryo-scanning electron microscopy. At least 8 mature stigmas were observed for each line. Scale bar = 100 µm.

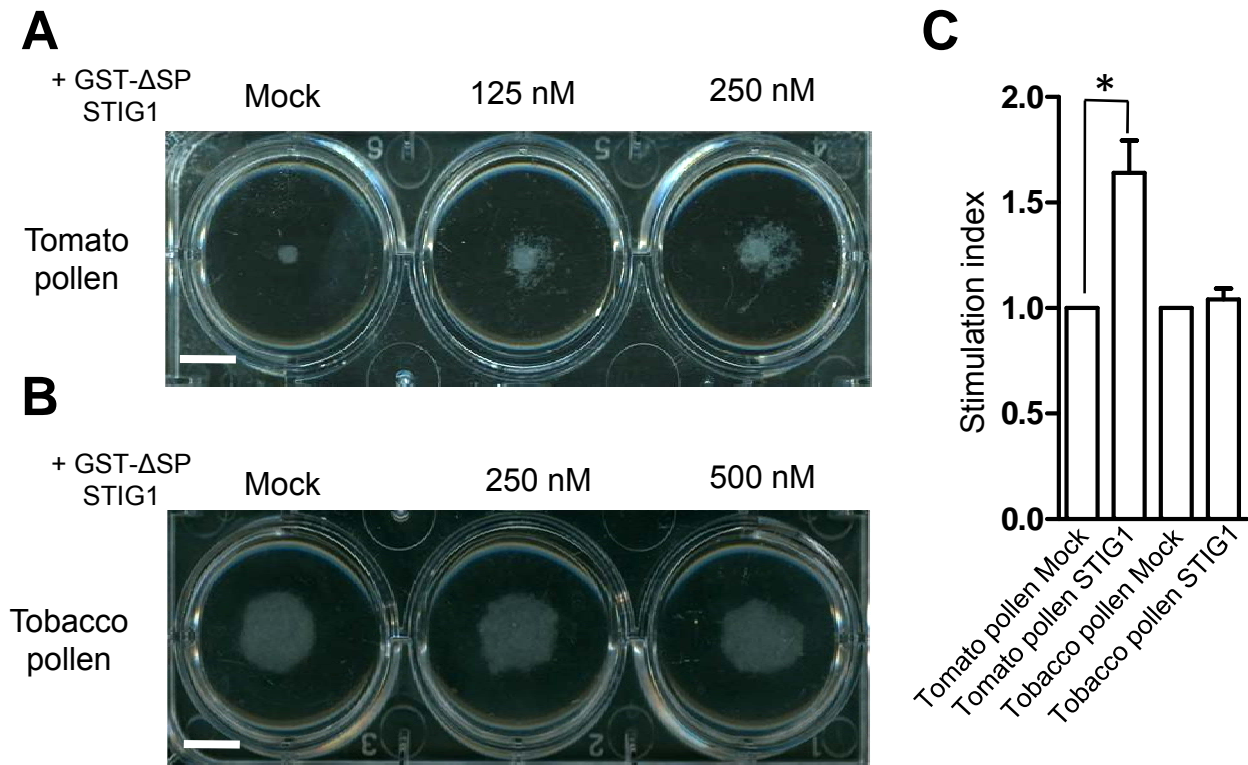

**Supplemental Figure 5.** STIG1 promotes pollen tube growth of tomato but not tobacco. A, B. STIG1 pollen tube growth promotion assay with tomato pollen (A) or tobacco pollen (B). C. Statistical analysis of the promotive effect of STIG1 in (A) and (B). The stimulation index is defined as the fold change between the area of the pollen tube cluster in the presence or absence of 250 nM STIG1.  $n = 3$  independent experiments. Asterisks indicate a significant difference ( $P < 0.05$ ; Student's  $t$  test). Error bars indicate standard error. Scale bar = 1 cm.

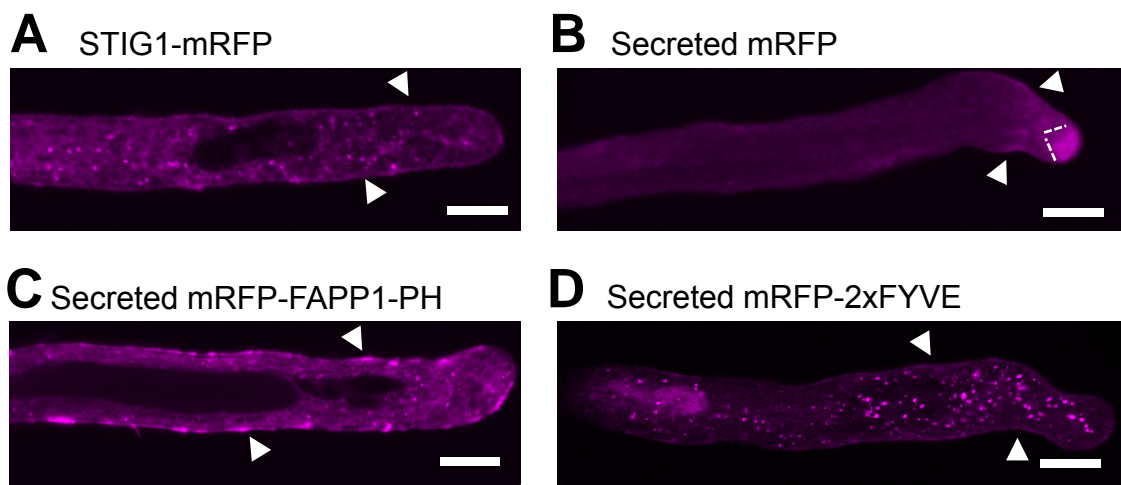

**Supplemental Figure 6.** STIG1 localizes both to the pollen tube wall and to intracellular punctate vesicles when ectopically expressed in pollen tubes. A-D. Representative pollen tubes expressing STIG1-mRFP (A), secreted mRFP (B), secreted mRFP-FAPP1-PH (C) or secreted mRFP-2xFYVE (D). In (B), (C) and (D), the coding sequences of mRFP, the PI(4)P marker mRFP-FAPP1-PH and the PI(3)P marker mRFP-2xFYVE were fused with the signal peptide coding region of LePRK2 at their N-termini. Arrowheads indicate the pollen tube margin. The dashed line in (B) indicates the clear zone. All genes were driven by the *LAT52* promoter and expressed transiently in tobacco pollen tubes. More than 15 tubes were observed for each bombardment experiment. Scale bar = 10  $\mu$ m.

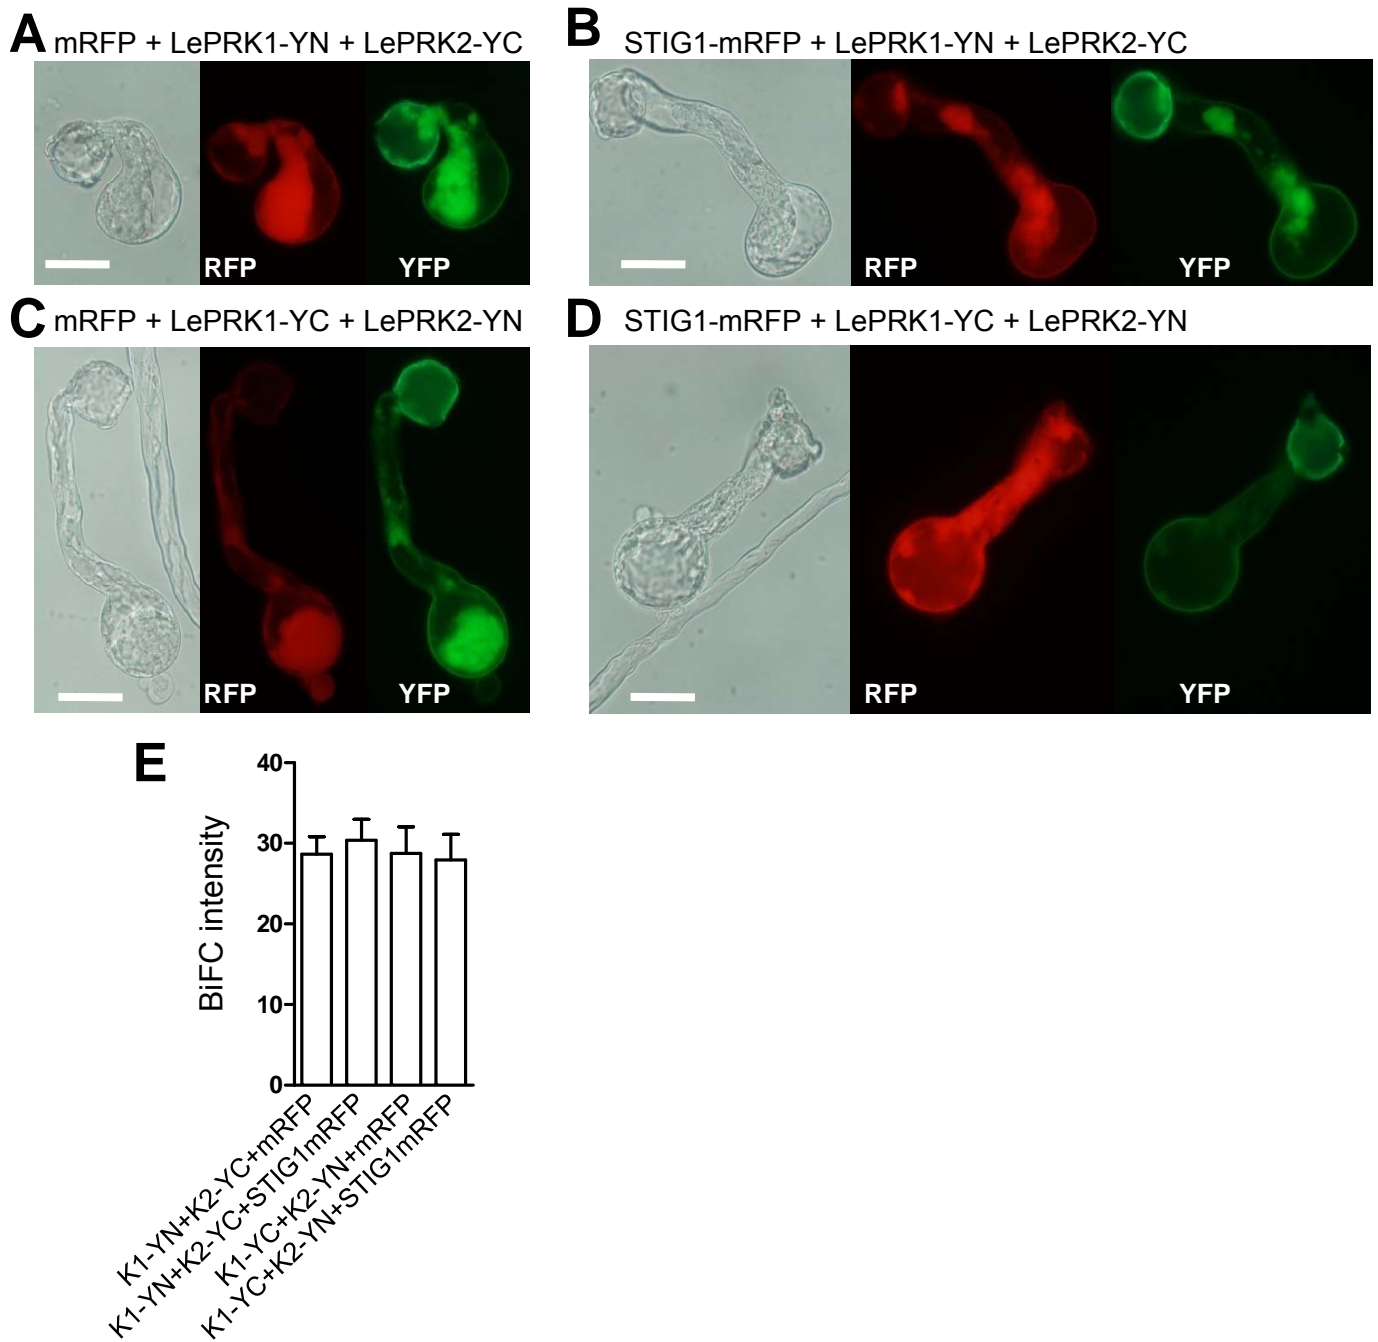

**Supplemental Figure 7.** STIG1 does not affect the BiFC interaction between LePRK1 and LePRK2. A-B. Representative pollen tubes co-expressing LePRK1-YN, LePRK2-YC with mRFP (A) or STIG1-mRFP (B). C-D. Representative pollen tubes co-expressing LePRK1-YC, LePRK2-YN with mRFP (C) or STIG1-mRFP (D). All genes were driven by the *LAT52* promoter and expressed transiently in tobacco pollen tubes. E. BiFC intensity of pollen tubes co-expressing the LePRK1-LePRK2 BiFC pairs with mRFP or STIG1-mRFP.  $n = 2$  independent experiments. At least 16 pollen tubes of each category were measured in each experiment. Asterisks indicate a significant difference ( $P < 0.05$ ; Student's *t* test). Error bars indicate standard error. Scale bar = 50  $\mu\text{m}$ .

**A** 250 nM

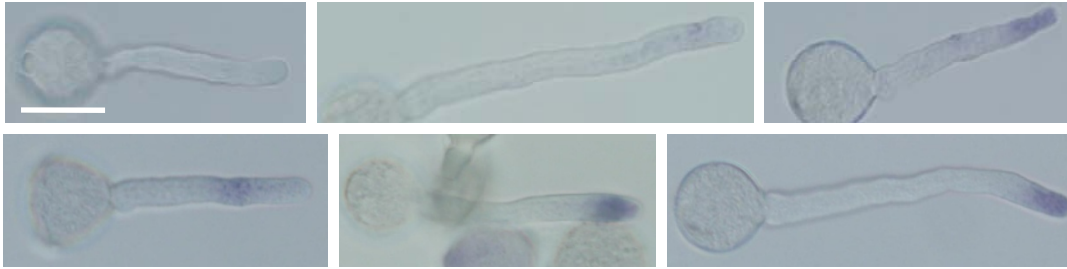

**B** 250 nM GST- $\Delta$ SP STIG1

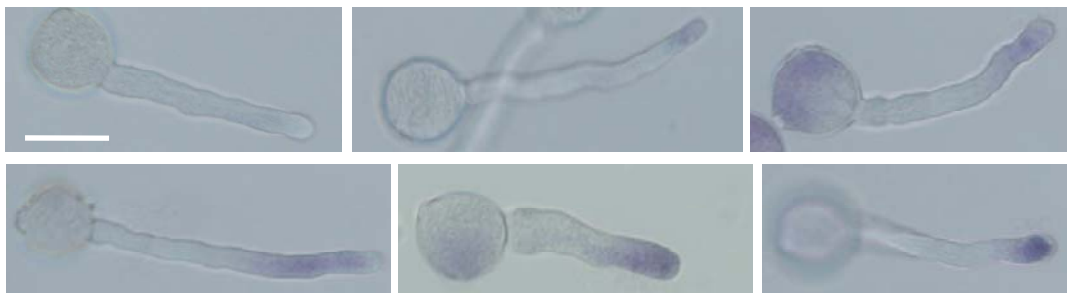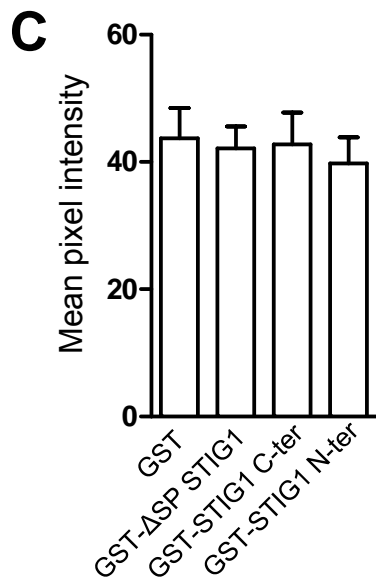

**Supplemental Figure 8.** Exogenous STIG1 did not affect extracellular superoxide production on the pollen tube surface. A and B. Representative images of NBT-stained pollen tubes growing in the presence of 250 nM recombinant GST (A) or GST- $\Delta$ SP STIG1 (B). Pollen tubes were cultured for 1.5 hours in a modified germination medium with 0.1 mM CaCl<sub>2</sub> and then stained with 1 mM NBT for 5 min. C. Mean pixel intensity of NBT-stained pollen tubes in the presence of GST or GST fusion proteins. n = 3 independent experiments. More than 16 pollen tubes of each group were measured in one experiment. Error bars indicate standard error. Scale bar = 30  $\mu$ m.



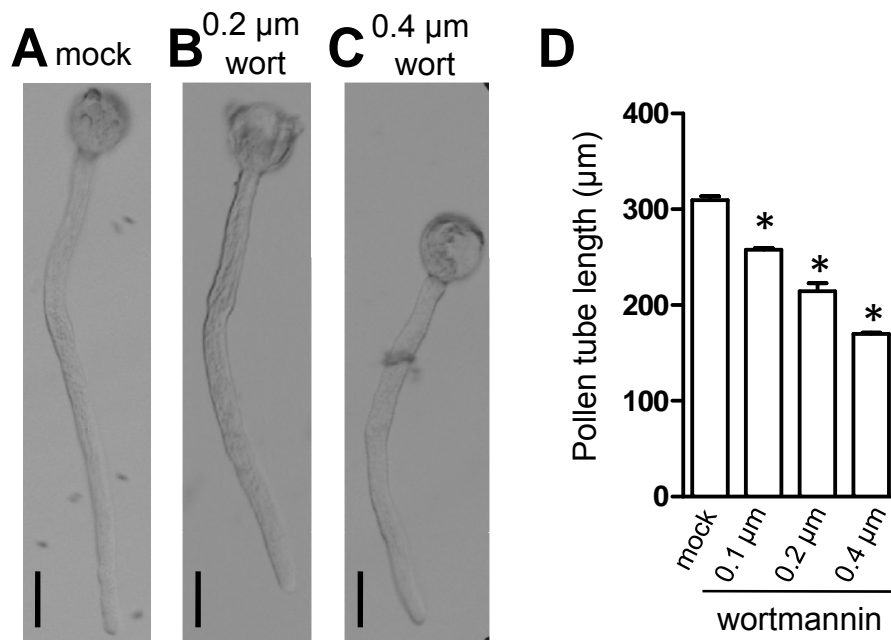

**Supplemental Figure 9.** Wortmannin reduces pollen tube length. Representative images of tomato pollen germinated in vitro and treated with DMSO (A), 0.2  $\mu\text{m}$  Wortmannin (B) or 0.4  $\mu\text{m}$  Wortmannin (C). D. Pollen tube lengths 3 hours after germination.  $N > 80$ . Asterisks indicate a significant difference from the control ( $P < 0.05$ ; Student's  $t$  test). Error bars indicate standard error. Scale bar = 30  $\mu\text{m}$ .

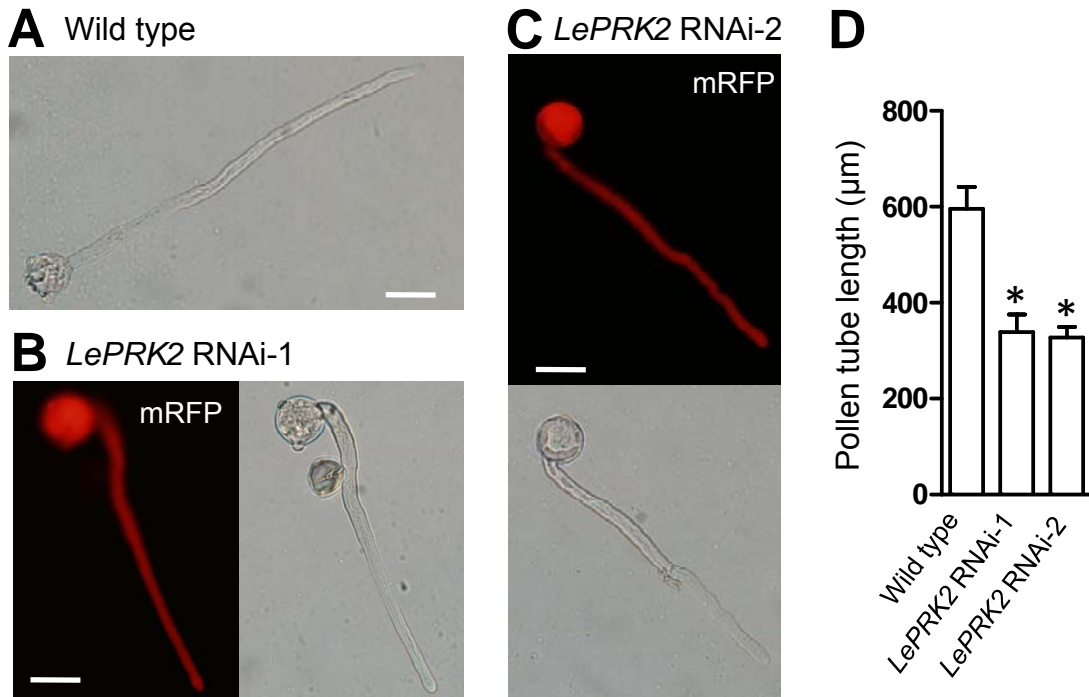

**Supplemental Figure 10.** *LePRK2* RNAi pollen grew shorter tubes in vitro. A-C. Representative images of a wild type pollen tube (A) or *LePRK2* RNAi pollen tubes (B and C) 2 hours after germination. D. Pollen tube lengths 4 hours after germination.  $n > 30$ , three independent experiments. Asterisks indicate a significant difference from wild type pollen tubes ( $P < 0.05$ ; Student's t test). Error bars indicate standard error. Scale bar = 30  $\mu\text{m}$ .

```

s1-STIG1 1 -----MDFI-ILLIAILALSSTPITIIISGSVTNHTY-----STNSYTNVALSAR-KVVF
Nt-STIG1 1 -----MAFINLLILIIILTLSTPITITMSIPETNRRN-----ATTNSYTDVALSAR-KGAF
Ph-STIG1 1 -----MAFI-NVLIIILTLSTPISILSGPVTYNTN-----STNSSTNVAVSAR-KGAD
At-GRI1 1 MVIKIPNTFIKATSLLSLILYFLIIATSKSNSVLADEVVDQEDDPEYYILDETPSILSNVTIISKTRLLV

                Dibasic motif      PI4P-binding motif
                ECD2-binding motif      PI3P-binding motif
s1-STIG1 49 PPRQLGK--DNSDDDLICKTCKRLS-EHRTCCFNYFCVDLFTNRFNCGSCGLVCIIVGTRCCGGICVDI
Nt-STIG1 50 PPRKLG EYSTNSIDYNLICKTCKRLS-ERN TCCFNYSCVDVSTNRFNCGSCGLVCNLGTRCCGGICVDI
Ph-STIG1 49 PPSKQPGG-----DNMICETCRALS-EKLTCCFNASCVDLSSNRFNCGSCGIVCDLRTRCCGGICVDI
At-GRI1 71 SHYKKIKKGM RCHVESYNICNGVKANKGTSLLHCCKKHCRNVLGDRNMCGRCGHKCGFGQRCCGGVCTYV

s1-STIG1 116 KKDNGNCGKCNVCS PGQNC SFGLCVSA
Nt-STIG1 119 QKDNGNCGKCSNVCSPGQKCSFGFCDYA
Ph-STIG1 111 TKDNGNCGNCGNACAPGQDCSFGLCGYA
At-GRI1 141 NFNPNHCGKCTRKCASGVKCEYGYCGYA

```

**Supplemental Figure 11.** Amino acid alignments of STIG1 homologs. Residues that are identical or conserved are shaded black or gray, respectively. Functional sites are boxed.

**A**

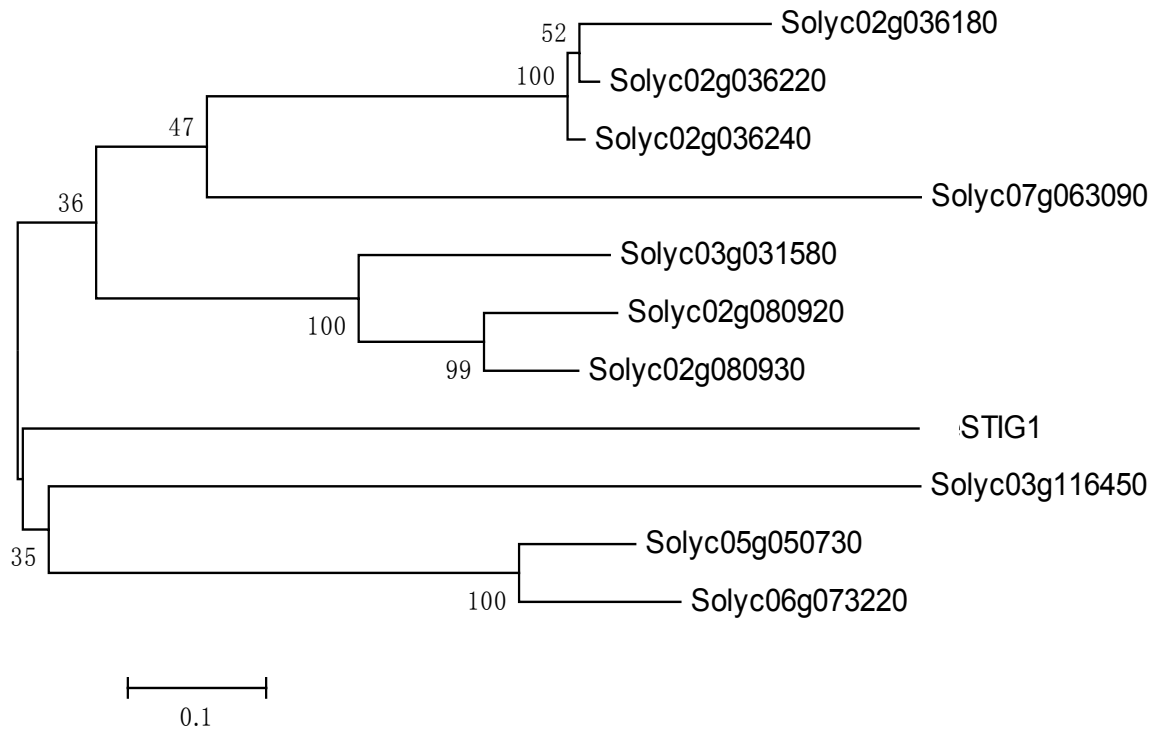

**B**

| Protein        | CCFN | YFCV | DLFT | TNRF | MCGS | CGLV | CVIV | GTTR | CCGG | ICVD | IKKD | NGMC | GRCN | NVVC | SPGQ | --- | CSF | GLCV | SAA |    |    |    |    |    |    |    |     |     |     |     |      |       |       |    |   |   |   |   |   |   |   |   |   |    |    |   |   |   |   |     |    |     |       |     |    |     |    |   |   |   |   |   |   |   |
|----------------|------|------|------|------|------|------|------|------|------|------|------|------|------|------|------|-----|-----|------|-----|----|----|----|----|----|----|----|-----|-----|-----|-----|------|-------|-------|----|---|---|---|---|---|---|---|---|---|----|----|---|---|---|---|-----|----|-----|-------|-----|----|-----|----|---|---|---|---|---|---|---|
| STIG1          | CC   | ~    | KKQ  | CV   | NV   | LN   | DR   | SM   | CG   | KCG  | KN   | CK   | KY   | SER  | CC   | QG  | WC  | VI   | YV  | NK | KH | CG | KC | NN | EC | KR | GSS | --- | CS  | YGM | CNYA |       |       |    |   |   |   |   |   |   |   |   |   |    |    |   |   |   |   |     |    |     |       |     |    |     |    |   |   |   |   |   |   |   |
| Solyc02g036240 | CC   | ~    | KKQ  | CV   | NV   | LN   | DR   | SM   | CG   | KCG  | KN   | CK   | KY   | SER  | CC   | QG  | WC  | VI   | YV  | NK | KH | CG | KC | NN | EC | KR | GSS | --- | CS  | YGM | CNYA |       |       |    |   |   |   |   |   |   |   |   |   |    |    |   |   |   |   |     |    |     |       |     |    |     |    |   |   |   |   |   |   |   |
| Solyc02g036220 | CC   | ~    | KKQ  | CV   | NV   | LN   | DR   | SM   | CG   | KCG  | KN   | CK   | KY   | SER  | CC   | QG  | WC  | VI   | YV  | NK | KH | CG | KC | NN | EC | KR | GSS | --- | CS  | YGM | CNYA |       |       |    |   |   |   |   |   |   |   |   |   |    |    |   |   |   |   |     |    |     |       |     |    |     |    |   |   |   |   |   |   |   |
| Solyc03g031580 | CC   | ~    | NKK  | CV   | NV   | LM   | NK   | Q    | CG   | FC   | GN   | CK   | KY   | NET  | CC   | KG  | QC  | VT   | LF  | NK | RH | CG | GC | NN | CK | Q  | EG  | GSS | --- | CA  | YGM  | C SYA |       |    |   |   |   |   |   |   |   |   |   |    |    |   |   |   |   |     |    |     |       |     |    |     |    |   |   |   |   |   |   |   |
| Solyc02g080920 | CC   | ~    | KKK  | CV   | NV   | FV   | DR   | Q    | NC   | GY   | CG   | KK   | CR   | Y    | NET  | CC  | MG  | QC   | VT  | LF | HK | RH | CG | GC | GN | CK | Q   | Q   | GSS | --- | CV   | YGM   | C SYA |    |   |   |   |   |   |   |   |   |   |    |    |   |   |   |   |     |    |     |       |     |    |     |    |   |   |   |   |   |   |   |
| Solyc02g036180 | CC   | ~    | KKQ  | CV   | NV   | LN   | DR   | SM   | CG   | KCG  | KN   | CK   | KY   | SER  | CC   | QG  | WC  | VD   | I   | YV | NK | KH | CG | KC | NN | EC | EV  | VH  | AL  | ME  | CA   | T     | MLN   | -- |   |   |   |   |   |   |   |   |   |    |    |   |   |   |   |     |    |     |       |     |    |     |    |   |   |   |   |   |   |   |
| Solyc05g050730 | CC   | ~    | NNK  | C    | I    | N    | L    | S    | Y    | D    | D    | H    | M    | C    | G    | A   | C   | K    | K   | C  | P  | F  | T  | E  | T  | C  | C   | R   | G   | E   | C    | V     | N     | L  | S | F | D | K | R | H | C | G | Y | C  | N  | N | R | C | M | T   | G  | G   | Y     | --- | CF | Y   | G  | I | C | D | Y | A |   |   |
| Solyc02g080930 | CC   | ~    | KKK  | CV   | NV   | L    | A    | D    | R    | Q    | N    | C    | G    | L    | C    | G   | K   | K    | C   | R  | Y  | N  | E  | T  | C  | C  | R   | G   | K   | C   | V    | N     | T     | L  | F | H | K | K | H | C | G | G | C | GN | CK | Q | Q | G | S | --- | CV | YGM | C SYA |     |    |     |    |   |   |   |   |   |   |   |
| Solyc06g073220 | CC   | ~    | NNK  | C    | M    | D    | L    | G    | Y    | D    | D    | H    | M    | C    | G    | A   | C   | K    | K   | C  | P  | F  | T  | E  | T  | C  | C   | R   | G   | Q   | C    | V     | N     | L  | S | Y | D | K | R | H | C | G | Y | C  | N  | N | R | C | M | T   | G  | G   | Y     | --- | CF | Y   | G  | I | C | D | Y | A |   |   |
| Solyc03g116450 | CC   | ~    | R    | N    | R    | C    | I    | D    | V    | T    | S    | D    | V    | M    | N    | C   | G   | F    | C   | R  | I  | K  | C  | P  | F  | T  | W   | Q   | C   | Q   | G    | I     | C     | I  | D | T | N | M | S | P | F | H | C | G  | S  | C | V | R | R | C   | Q  | P   | P     | S   | L  | --- | CF | N | G | M | C | G | Y | A |
| Solyc07g063090 | CC   | ~    | KKH  | C    | R    | N    | V    | L    | G    | D    | M    | N    | N    | C    | G    | K   | C   | Q    | N   | K  | C  | N  | L  | L  | Q  | R  | C   | G   | G   | V   | C    | T     | R     | V  | I | D | D | P | K | M | C | G | K | C  | N  | R | V | C | K | D   | G  | V   | K     | --- | C  | E   | N  | G | Y | C | G | Y | A |   |

**Supplemental Figure 12.** STIG1 domain-containing proteins in tomato. A. Phylogenetic tree of STIG1 homologs in tomato. Amino acid sequences were analyzed by a neighbor-joining method with genetic distances calculated by the Poisson model of amino acid changes (MEGA 5.2, Tamura et al., 2011). The numbers at the nodes represent bootstrap values based on 1000 replications. The lengths of the branches are proportional to the expected numbers of amino acid substitutions per site; scale provided at the bottom. B. Amino acid alignments of STIG1 domains. Residues that are identical or conserved are shaded black or gray, respectively. (~) indicates an inserted gap.

Supplemental Table 1. Constructs

| Use                                          | Construct                                 | Plasmid name | Insert or PCR product                      | Primers                 | Template                    | Plasmid backbone | Cloning method                |
|----------------------------------------------|-------------------------------------------|--------------|--------------------------------------------|-------------------------|-----------------------------|------------------|-------------------------------|
| Transient expression in tobacco pollen tubes | ProLAT52:mRFP                             | Pzd-05       | Previously generated in Zhang et al., 2008 |                         |                             |                  |                               |
|                                              | ProLAT52:eGFP                             | W33          |                                            |                         |                             |                  |                               |
|                                              | ProLAT52:STIG1-mRFP                       | 010-42       | STIG1 cDNA                                 | P1/P2                   | stigma cDNA                 | Pzd-05           | SacI/EcoRI                    |
|                                              | ProLAT52: secreted mRFP                   | 011-61       | LePRK2 signal peptide                      | P3/P4                   | pLAT52::LePRK2-GFP          | Pzd-05           | NcoI/NotI                     |
|                                              | ProLAT52: BFP-FAPP1 PH                    | 012-219      | BFP -FAPP1-PH                              | P5/P6<br>P7/P8          | pTagBFP-N<br>PLEKHA3        | Pzd-05           | NcoI/EcoRI<br>EcoRI/BamHI     |
|                                              | ProLAT52: secreted mRFP-2XFYVE            | 012-258      | 2xFYVE                                     | P9/P10                  | ProLAT52:2XFYVE-mRFP        | 011-61           | SpeI/NotI                     |
|                                              | ProLAT52: secreted mRFP-FAPP1 PH          | 012-259      | FAPP1 PH                                   | P11/P12                 | 012-219                     | 011-61           | SpeI/NotI                     |
|                                              | STIG1 1-75-mRFP                           | 012-13       | STIG1 1-75                                 | P1/P13                  | 010-42                      | Pzd-05           | SacI/EcoRI                    |
|                                              | STIG1 16-75mRFP                           | 012-52       | STIG1 16-75                                | P14/P13                 | 010-42                      | Pzd-05           | SacI/EcoRI                    |
|                                              | STIG1 76-143-mRFP                         | 012-128      | STIG1 76-143                               | P15/P2                  | 010-42                      | Pzd-05           | SacI/EcoRI                    |
|                                              | STIG1 88-143-mRFP                         | 012-32       | STIG1 88-143                               | P16/P2                  | 010-42                      | Pzd-05           | SacI/EcoRI                    |
|                                              | STIG1 76-87-mRFP                          | 012-153      | STIG1 76-87                                | P17/P18                 | 012-128                     | Pzd-05           | Sall/EcoRI                    |
|                                              | STIG1 88-115-mRFP                         | 012-87       | STIG1 88-115                               | P17/P19                 | 012-32                      | Pzd-05           | Sall/EcoRI                    |
|                                              | STIG1 77-87-mRFP                          | 012-168      | STIG1 77-87                                | P20/P21                 | 012-153                     | Pzd-05           | SacI/KpnI                     |
|                                              | STIG1 78-87-mRFP                          | 012-167      | STIG1 78-87                                | P22/P21                 | 012-153                     | Pzd-05           | SacI/KpnI                     |
|                                              | STIG1 79-87-mRFP                          | 012-166      | STIG1 79-87                                | P23/P21                 | 012-153                     | Pzd-05           | SacI/KpnI                     |
|                                              | STIG1 76-86-mRFP                          | 012-169      | STIG1 76-86                                | P17/P24                 | 012-153                     | Pzd-05           | Sall/EcoRI                    |
|                                              | STIG1 76-85-mRFP                          | 012-170      | STIG1 76-85                                | P17/P25                 | 012-153                     | Pzd-05           | Sall/EcoRI                    |
|                                              | STIG1 76-84-mRFP                          | 012-171      | STIG1 76-84                                | P17/P26                 | 012-153                     | Pzd-05           | Sall/EcoRI                    |
|                                              | STIG1 76-83-mRFP                          | 012-172      | STIG1 76-83                                | P17/P27                 | 012-153                     | Pzd-05           | Sall/EcoRI                    |
|                                              | STIG1 88-114-mRFP                         | 012-191      | STIG1 88-114                               | P17/P28                 | 012-87                      | Pzd-05           | Sall/EcoRI                    |
|                                              | STIG1 89-115-mRFP                         | 012-193      | STIG1 89-115                               | P29/P21                 | 012-87                      | Pzd-05           | SacI/KpnI                     |
|                                              | STIG1 91-115-mRFP                         | 012-195      | STIG1 91-115                               | P30/P21                 | 012-87                      | PZD05            | SacI/KpnI                     |
|                                              | STIG1 92-115-mRFP                         | 012-196      | STIG1 92-115                               | P31/P21                 | 012-87                      | PZD05            | SacI/KpnI                     |
|                                              | STIG1 F80A-mRFP                           | 012-215      | STIG1 F80A                                 | P32/P33                 | 010-42                      | Pzd-05           | Fast mutagenesis              |
|                                              | STIG1 N81A-mRFP                           | 012-216      | STIG1 N81A                                 | P34/P35                 | 010-42                      | Pzd-05           | Fast mutagenesis              |
|                                              | STIG1Y82A F83A-mRFP                       | 012-243      | STIG1 Y82A F83A                            | P36/P37                 | 010-42                      | Pzd-05           | Fast mutagenesis              |
|                                              | STIG1 Y82A F83A F88D R91E F92D I115D-mRFP | 012-247      | STIG1 Y82A F83A F88D R91E F92D I115D       | P38/P39<br>P40/P41      | 012-243                     | Pzd-05           | Two step fast mutagenesis     |
|                                              | STIG1 V85D L87E-mRFP                      | 012-209      | STIG1 V85D L87E                            | P42/P43                 | 010-42                      | Pzd-05           | Fast mutagenesis              |
|                                              | STIG1 V85D L87E F88D R91E F92D I115D-mRFP | 012-246      | STIG1 V85D L87E F88D R91E F92D I115D       | P44/P45<br>P40/P41      | 012-209                     | Pzd-05           | Two step fast mutagenesis     |
|                                              | ProLAT52:LePRK2-YN                        | K308         | (1) LePRK2;<br>(2) YFP 1-172               | P101/P102;<br>P103/P104 | (1) LePRK2<br>cDNA; (2) YFP | W33              | (1) NcoI/SacI; (2) NheI/BamHI |
|                                              | ProLAT52:LePRK2-YC                        | K310         | (1) LePRK2;<br>(2) YFP 172-238             | P101/P102;<br>P105/P106 | (1) LePRK2<br>cDNA; (2) YFP | W33              | (1) NcoI/SacI; (2) NheI/BamHI |
|                                              | ProLAT52:LePRK1-YN                        | K307         | (1) LePRK1;<br>(2) YFP 1-172               | P107/P108;<br>P103/P104 | (1) LePRK1<br>cDNA; (2) YFP | W33              | (1) NcoI/SacI; (2) NheI/BamHI |
|                                              | ProLAT52:LePRK1-YC                        | K309         | (1) LePRK1;<br>(2) YFP 172-238             | P107/P108;<br>P105/P106 | (1) LePRK1<br>cDNA; (2) YFP | W33              | (1) NcoI/SacI; (2) NheI/BamHI |

Supplemental Table 1. Continued

| Use                                             | Construct                                | Plasmid name | Insert or PCR product                    | Primers | Template    | Plasmid backbone | Cloning method   |
|-------------------------------------------------|------------------------------------------|--------------|------------------------------------------|---------|-------------|------------------|------------------|
| Yeast two-hybrid                                | BD-STIG1 16-143                          | 011-145      | STIG1 16-143                             | P46/P47 | 010-42      | pGBKT7           | EcoRI/PstI       |
|                                                 | BD-STIG1 16-75                           | 012-8        | STIG1 16-75                              | P46/P48 | 010-42      | pGBKT7           | EcoRI/PstI       |
|                                                 | BD-STIG1 76-143                          | 012-9        | STIG1 76-143                             | P49/P47 | 010-42      | pGBKT7           | EcoRI/PstI       |
|                                                 | BD-STIG1 102-143                         | 012-78       | STIG1 102-143                            | P50/P47 | 010-42      | pGBKT7           | EcoRI/PstI       |
|                                                 | BD-STIG1 76-83                           | 012-182      | STIG1 76-83                              | P51/P52 | 012-9       | pGBKT7           | XhoI/PstI        |
|                                                 | BD-STIG1 80-83                           | 012-205      | STIG1 80-83                              | P51/P53 | —           | pGBKT7           | XhoI/BamHI       |
|                                                 | BD-STIG1 81-83                           | 012-213      | STIG1 81-83                              | P51/P54 | —           | pGBKT7           | XhoI/BamHI       |
|                                                 | BD-STIG1 80-82                           | 012-214      | STIG1 80-82                              | P51/P55 | —           | pGBKT7           | XhoI/BamHI       |
|                                                 | BD-STIG1 F80A                            | 012-227      | STIG1 F80A                               | P32/P33 | 011-145     | pGBKT7           | Fast mutagenesis |
|                                                 | BD-STIG1 N81A                            | 012-228      | STIG1 N81A                               | P34/P35 | 011-145     | pGBKT7           | Fast mutagenesis |
|                                                 | BD-STIG1 Y82A                            | 012-229      | STIG1 Y82A                               | P56/P57 | 011-145     | pGBKT7           | Fast mutagenesis |
|                                                 | BD-STIG1 F83A                            | 012-230      | STIG1 F83A                               | P58/P59 | 011-145     | pGBKT7           | Fast mutagenesis |
|                                                 | BD-STIG1 Y82A F83A                       | 012-252      | STIG1 Y82A F83A                          | P36/P37 | 011-145     | pGBKT7           | Fast mutagenesis |
|                                                 | BD-STIG1 Y82A F83A F88D R91E F92D I115D  | 012-256-2    | STIG1 Y82A F83A F88D R91E F92D I115D     | P46/P47 | 012-247     | pGBKT7           | EcoRI/PstI       |
|                                                 | BD-V85D L87E F88D R91E F92D I115D-mRFP   | 012-255-2    | STIG1 V85D L87E F88D R91E F92D I115D     | P46/P47 | 012-246     | pGBKT7           | EcoRI/PstI       |
|                                                 | AD-ECD2                                  | 011-138      | ECD2                                     | P60/P61 | LePRK2 cDNA | pGADT7           | NdeI/BamHI       |
| Recombinant protein expression in <i>E.Coli</i> | GST-Δ SP STIG1                           | 011-98       | Δ SP STIG1                               | P62/P63 | 010-42      | pGEX4T3          | BamHI/Sall       |
|                                                 | GST- STIG1 N ter                         | 012-23       | Δ SP STIG1-N ter                         | P62/P64 | 010-42      | pGEX4T3          | BamHI/Sall       |
|                                                 | GST- STIG1 C ter                         | 012-22       | ΔSP STIG1-C ter                          | P65/P63 | 010-42      | pGEX4T3          | BamHI/Sall       |
|                                                 | GST-STIG1 F80A                           | 012-248      | ΔSP STIG1 F80A                           | P62/P63 | 012-215     | pGEX4T3          | BamHI/Sall       |
|                                                 | GST-STIG1 Y82A F83A                      | 012-249      | ΔSP STIG1 Y82A F83A                      | P62/P63 | 012-243     | pGEX4T3          | BamHI/Sall       |
|                                                 | GST-STIG1 Y82A F83A F88D R91E F92D I115D | 012-250      | ΔSP STIG1 Y82A F83A F88D R91E F92D I115D | P62/P63 | 012-247     | pGEX4T3          | BamHI/Sall       |
|                                                 | GST-STIG1 V85D L87E F88D R91E F92D I115D | 012-251      | ΔSP STIG1 V85D L87E F88D R91E F92D I115D | P62/P63 | 012-246     | pGEX4T3          | BamHI/Sall       |
|                                                 | GST-STIG1 N81A                           | 012-256      | ΔSP STIG1 N81A                           | P62/P63 | 012-216     | pGEX4T3          | BamHI/Sall       |
|                                                 | GST-STIG1 76-87                          | 012-237      | STIG1 76-87                              | P66/P67 | 012-153     | pGEX4T3          | BamHI/NotI       |
|                                                 | GST-STIG1 88-115                         | 012-238      | STIG1 88-115                             | P68/P67 | 012-87      | pGEX4T3          | BamHI/NotI       |
|                                                 | 6xHis-ECD2                               | 012-102      | ECD2                                     | P69/P70 | LePRK2 cDNA | pRSET-C          | NheI/BamHI       |
|                                                 | 6xHis-ΔSP STIG1-mRFP                     | 012-108      | ΔSP STIG1                                | P71/P72 | 010-42      | pRSET-C          | NheI/KpnI        |
|                                                 | 6xHis-eGFP                               | 014-1        | eGFP                                     | P73/P74 | W33         | pRSET-C          | NheI/EcoRI       |
|                                                 | 6xHis-eGFP-2xFYVE                        | 014-2        | eGFP-2xFYVE                              | P75/P76 | 014-1       | pRSET-C          | NcoI/EcoRI       |

**Supplemental Table 1. Continued**

| Use                         | Construct                             | Plasmid name | Insert or PCR product                           | Primers                                  | Template                               | Plasmid backbone | Cloning method                                     |
|-----------------------------|---------------------------------------|--------------|-------------------------------------------------|------------------------------------------|----------------------------------------|------------------|----------------------------------------------------|
| <b>LePRK2-OX (010-184)</b>  | ProLePRK2:eGFP                        | 010-142      | LePRK2 promoter                                 | P77/P78                                  | Genomic DNA                            | W33              | Clal/NcoI                                          |
|                             | ProLePRK2:LePRK2-eGFP                 | 010-160      | LePRK2                                          | P79/P80                                  | LePRK2 cDNA                            | 010-142          | NcoI/NotI                                          |
|                             | pC2300-ProLePRK2:LePRK2-eGFP          | 010-184      | ProLePRK2:LePRK2-eGFP                           | —                                        | 010-160                                | pCAMBIA 2300     | PstI                                               |
| <b>STIG1-OX (012-1)</b>     | Pro35S:STIG1-mRFP                     | 011-132      | CaMV 35S promoter                               | P81/P82                                  | pPK100                                 | 010-42           | Sall/SacI                                          |
|                             | pC2300-Pro35S:STIG1-mRFP              | 012-1        | Pro35S:STIG1-mRFP                               | —                                        | 011-132                                | pCAMBIA 2300     | HindIII                                            |
| <b>roGFP1 (09-46)</b>       | ProLAT52-roGFP1                       | 09-36        | RoGFP1                                          | P83/P84                                  | roGFP1 cDNA                            | Pzd-05           | NcoI/BamHI                                         |
|                             | pC2300-ProLAT52-roGFP1-eGFP           | 09-46        | ProLAT52-RoGFP1-eGFP                            | —                                        | 09-36                                  | pCAMBIA 2300     | HindIII                                            |
| <b>STIG1-RNAi (09-102)</b>  | Pro35S:LAT52 intron:35 S terminator   | 09-69        | (1)Pro35S; (2) LAT52 intron;(3)35S terminator   | (1)P85/P86;<br>(2)P87/P88;<br>(3)P89/P90 | (1),(3)<br>pPK100; (2)<br>Genomic DNA; | pTG19-T          | (1)Sacl/XhoI;<br>(2)XhoI/XbaI;<br>(3)XbaI/HindIII  |
|                             | STIG1 RNAi casset                     | 09-80        | (1) STIG1 sense; (2) STIG1 antisense            | (1)P91/P92;<br>(2)P93/P94                | (1), (2) STIG1 cDNA                    | 09-69            | (1)XhoI/EcoRV;<br>(2)NdeI/NcoI                     |
|                             | pC2300- STIG1 RNAi                    | 09-102       | STIG1 RNAi casset                               | —                                        | 09-80                                  | pCAMBIA 2300     | SacI/PstI                                          |
| <b>LePRK2-RNAi (09-114)</b> | ProLAT52:LAT52 intron:35 S terminator | 09-71        | (1)ProLAT52; (2) LAT52 intron;(3)35S terminator | (1)P95/P96;<br>(2)P87/P88;<br>(3)P89/P90 | (1), (3) Pzd05;<br>(2) Genomic DNA;    | pTG19-T          | (1)EcoRI/XhoI;<br>(2)XhoI/XbaI;<br>(3)XbaI/HindIII |
|                             | LePRK2 RNAi casset                    | 09-82        | (1) LePRK2 sense; (2) LePRK2 antisense          | (1) P97/P98;<br>(2) P99/P100             | (1), (2)<br>LePRK2 cDNA                | 09-71            | (1)XhoI/EcoRV;<br>(2)NdeI/SpeI                     |
|                             | pC2300- LePRK2 RNAi                   | 09-91        | LePRK2 RNAi casset                              | —                                        | 09-82                                  | pCAMBIA 2300     | EcoRI/HindIII                                      |
|                             | pC2300- LePRK2 RNAi-mRFP              | 09-114       | ProLAT52:mRFP:35S terminator                    | —                                        | Pzd-05                                 | 09-91            | HindIII                                            |

**Zhang, D., Wengier, D., Shuai, B., Gui, C.P., Muschietti, J., McCormick, S., and Tang, W.H. (2008).** The pollen receptor kinase LePRK2 mediates growth-promoting signals and positively regulates pollen germination and tube growth. *Plant physiol.* **148**: 1368–1379.

**Supplemental Table 2. Primers**

| Primer | Sequence (5'-3')                              | Primer | Sequence (5'-3')                                   |
|--------|-----------------------------------------------|--------|----------------------------------------------------|
| P1     | GAGCTCCATGGATTTTATCATCCTTCTCATC               | P36    | CACCGTACATGTTGTTTCAACGCCGCTTGTGTGATTGTTTAC         |
| P2     | GAATTCGGCACTGACACAAAGGCCAAATGAG               | P37    | GTGAACAAATCAACACAAGCGGCGTTGAAACAACATGTACGGTG       |
| P3     | CCATGGGCATGTCATCACAAAAAACTAC                  | P38    | CACCGTACATGTTGTTTCAACGCCGCTTGTGTGATTGGACACCAAC     |
| P4     | GCGGCCGCTTGCCTCTGTCACAAATGCTAATG              | P39    | GTTGGTGTCCAAATCAACACAAGCGGCGTTGAAACAACATGTACGGTG   |
| P5     | CCATGGGCATGAGCGAGCTGATTAAGGAG                 | P40    | GCGGTGGGATCTGTGTGGACGACAAGAAAGACAACGAAATTG         |
| P6     | GAATTCATTAAGCTTGTGCCCAAGTTTGC                 | P41    | CAATTCGTTGTCTTTCTTGTGCGTCCACACAGATCCCACCGC         |
| P7     | GAATTCCTCATGGAGGGGGTGTGTACAAG                 | P42    | GTTGTTTCAACTACTTTTGTGATGATGAGTTTACCACAGGTTCAACTG   |
| P8     | GGATCCTTATTTAGTCCTTGTATCAGTCAAAC              | P43    | CAGTTGAACCTGTTGGTGAACCTCATCATCACAAAAGTAGTTGAAACAAC |
| P9     | ACTAGTTTATGCCTTCTTGTTCAGCTGC                  | P44    | GTTGTTTCAACTACTTTTGTGATGATGAGGACACCAACGAGGACAACCTG |
| P10    | GCGGCCGCTTATGCCTTCTTGTTCAGCTGC                | P45    | CAGTTGTCTCGTTGGTGTCTCATCATCACAAAAGTAGTTGAAACAAC    |
| P11    | ACTAGTAGTGGACCAACTATCTCACAG                   | P46    | GAATTCACACCAATTACCATTATATCCG                       |
| P12    | GCGGCCGCTTATTTAGTCCTTGTATCAGTCAAACATG         | P47    | CTGCAGTTAGGCACTGACACAAAGGCCAAATG                   |
| P13    | GAATTCGTGTTCTGATAATCTCTTGAAGTTTTG             | P48    | CTGCAGTTAGTGTCTGATAATCTCTTGAAG                     |
| P14    | GAGCTCGACACCAATTACCATTATATC                   | P49    | GAATTCGTACATGTTGTTTCAACTAC                         |
| P15    | GAGTCCCCTGACATGTTGTTTCAACTACTTTTG             | P50    | GAATTCATCGTTGGAACAAGATGCTGCC                       |
| P16    | GAGCTCGTTACCAACAGGTTCAACTGTGGC                | P51    | CTCGAGAAGACCTTGACATGATTTTG                         |
| P17    | GCAGGTCGACATACTCGACTCAGAAGGTATTG              | P52    | CTGCAGTTAAAAGTAGTTGAAACAACATGTAC                   |
| P18    | GAATTCAAATCAACACAAAAGTAGTTG                   | P53    | GGATCCTTAAAAGTAGTTGAACATATGCAGGTCCTCCTCTGAGATCAG   |
| P19    | GAATTCGATGTCCACACAGATCCCACC                   | P54    | GGATCCTTAAAAGTAGTTTATATGCAGGTCCTCCTCTGAGATCAG      |
| P20    | GAGTCCACATGTTGTTTCAACTACTTTTG                 | P55    | GGATCCTTAGTAGTTAAACATATGCAGGTCCTCCTCTGAGATCAG      |
| P21    | GGTACCTTAGCGCCCGTGGAGTGGC                     | P56    | CACCGTACATGTTGTTTCAACGCCCTTTTGTGTGATTGTTTAC        |
| P22    | GAGCTCCTGTTGTTTCAACTACTTTTGTG                 | P57    | GTGAACAAATCAACACAAAAGCGGTTGAAACAACATGTACGGTG       |
| P23    | GAGCTCCTGTTTCAACTACTTTTGTGTTG                 | P58    | GTACATGTTGTTTCAACTACGCTTGTGTTGATTGTTTACCAAC        |
| P24    | GAATTCATCAACACAAAAGTAGTTGAAACAAC              | P59    | GTTGGTGAACAAATCAACACAAGCGTAGTTGAAACAACATGTAC       |
| P25    | GAATTCACACAAAAGTAGTTGAAACAAC                  | P60    | CATATGCGGGGTTCTCATCATCATC                          |
| P26    | GAATTCACAAAAGTAGTTGAAACAACATG                 | P61    | GGATCCCTTCCAACCTGATGATGATGATG                      |
| P27    | GAATTCAAAGTAGTTGAAACAACATGTAC                 | P62    | GGATCCACACCAATTACCATTATATCCGGA                     |
| P28    | GAATTCGTCCACACAGATCCACCCGACG                  | P63    | GTCGACTTAGGCACTGACACAAAGGCCAAATG                   |
| P29    | GAGCTCGACCAACAGGTTCAACTGTGGCTC                | P64    | GTCGACTTAGTGTCTGATAATCTCTTGAAG                     |
| P30    | GAGCTCGAGGTTCAACTGTGGCTCCTGTG                 | P65    | GGATCCCCTGACATGTTGTTTCAACTAC                       |
| P31    | GAGCTCGTTCAACTGTGGCTCCTGTGGC                  | P66    | GGATCCCCTGACATGTTGTTTCAACTAC                       |
| P32    | CAGAACACCGTACATGTTGTGCCAACTACTTTTGTGTTGATTTG  | P67    | GCGGCCGCTAAAGGGAACAAAAGCTGGGTAC                    |
| P33    | CAAATCAACACAAAAGTAGTTGGCACAACATGTACGGTGTCTG   | P68    | GGATCCTTACCACAGGTTCAACTGTGGC                       |
| P34    | GAACACCGTACATGTTGTTTGCCTACTTTTGTGTTGATTTGTTT  | P69    | GCTAGCAACTTATCAGAGCCTGAGGTTT                       |
| P35    | GAACAAATCAACACAAAAGTAGGCGAAACAACATGTACGGTGTTC | P70    | GGATCCCTTCCAACCTGATGATGATG                         |



**Supplemental Table 2. Continued**

| Primer | Sequence (5'-3')                                       |
|--------|--------------------------------------------------------|
| P71    | GCTAGCTCTGTGACAAACCATACATATTC                          |
| P72    | TGGTACCTTAGGCGCCGGTGGAGTGGCGGCCCTC                     |
| P73    | GCTAGCATGCTGAGCAAGGGCGAGGAG                            |
| P74    | GAATTCTTACTTGTACAGCTCGTCCATG                           |
| P75    | CCATGGGAGGTGCTGGTGCTGGTGCTGGTGTC                       |
| P76    | GAATTCTTATGCCTTCTTGTTCAGCTG                            |
| P77    | ATCGATTGGTGCATTTTCTCAACTTCTC                           |
| P78    | CCATGGGATTGCATAGAGAAGAGAGTCAGTC                        |
| P79    | CCATGGGCATGTCATCACAAAAAACTAC                           |
| P80    | GCGGCCGCCTCTTGAAGTATGCATATTGTCAACTTC                   |
| P81    | GTCGACGAGCACGACACACTTGTCTACTCC                         |
| P82    | GAGCTCGGCTATCGTTCGTAATGGTGA                            |
| P83    | CCATGGTGAGCAAGGGCGAGGAGCTGTTC                          |
| P84    | GGATCCCAAGATTTTACTTGTACAGCTCGTCCATGCC                  |
| P85    | GAGCTCGAGCACGACACACTTGTCTACTCC                         |
| P86    | CTCGAGGGCTATCGTTCGTAATGGTGA                            |
| P87    | CTCGAGAGATCTGCGGCCGCGATATCGAATTGGTATATACTATATTTTCATTAC |
| P88    | ACTAGTCCATGGGCTAGCCATATGTCCCAACTATTTGCAACAAAACAAAACAT  |
| P89    | TCTAGAGTCCGCAAAAATCACCAGTCTC                           |
| P90    | AAGCTTGCATGCCTGCAGGTCAGTGA                             |
| P91    | CTCGAGATGGATTTTATCATCCTTCTC                            |
| P92    | GATATCGGCACTGACACAAAGGCCAAATG                          |
| P93    | CCATGGATGGATTTTATCATCCTTCTC                            |
| P94    | CATATGGGCACTGACACAAAGGCCAAATG                          |
| P95    | GAATTCGTGACATACTCGACTCAGAAGGTATTGAG                    |
| P96    | CTCGAGGTAATTGGAAATTTTTTTTTTGG                          |
| P97    | CTCGAGATGTCATCACAAAAAACTAC                             |
| P98    | GATATCTGATCAATTGGACCAGAAAACCTTG                        |
| P99    | ACTAGTATGTCATCACAAAAAACTAC                             |
| P100   | CATATGTGATCAATTGGACCAGAAAACCTTG                        |
| P101   | CCATGGCATCACAAAAAACTACAAAAAC                           |
| P102   | GAGCTCCTTGAAGTATGCATATTGTCAAC                          |
| P103   | GCTAGCGTGAGCAAGGGCGAGGAGCTG                            |
| P104   | GGATCCTTAGTCCTCGATGTTGTGGCGGATC                        |
| P105   | GCTAGCGGCAGCGTGCAGCTCGCCGAC                            |
| P106   | GGATCCTCACTTGTACAGCTCGTCCATGC                          |
| P107   | CCATGGCGGTGGCTTATCGTTATAGC                             |
| P108   | GAGCTCATGTTTCATCGAAACCTGAGTATA                         |
